# Supplementary material for: Factors influencing the crystal chemistry of chemically delithiated layered HxNi1−y−zMnyCozO2
Source: Royal Society of Chemistry journal article supplement (doi:10.1039/b600529b), 2006-01-01
Supplement: b600529b.pdf [file b600529b.pdf]

Supplementary material (ESI) for Journal of Materials Chemistry  
This journal is © The Royal Society of Chemistry 2006

Supplementary Information for

**Factors influencing the crystal chemistry of chemically delithiated layered  
 $\text{H}_x\text{Ni}_{1-y-z}\text{Mn}_y\text{Co}_z\text{O}_2$**

J. Choi and A. Manthiram\*  
Materials Science and Engineering Program  
The University of Texas at Austin  
Austin, TX 78712

**This file includes:**

Figures S1, S2, and S3.

---

\* To whom correspondence should be addressed.  
Phone: 512-471-1791. Fax: 512-471-7681  
E-mail: rmanth@mail.utexas.edu

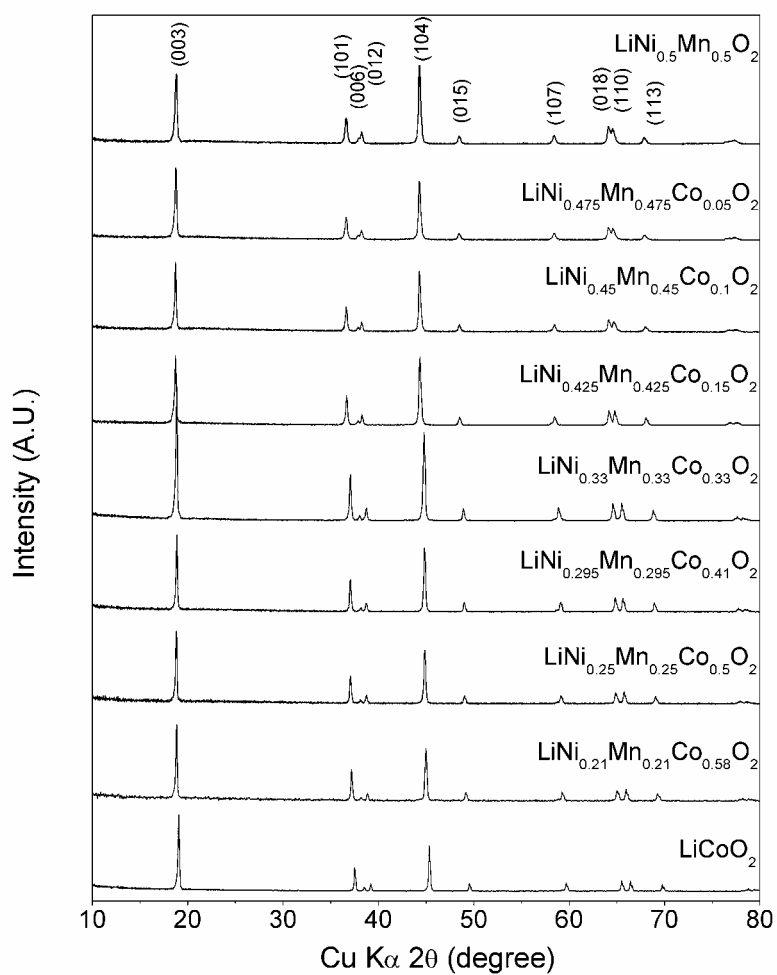

**Fig. S1** X-ray diffraction patterns of  $\text{LiNi}_{0.5-y}\text{Mn}_{0.5-y}\text{Co}_{2y}\text{O}_2$  for  $0 \leq 2y \leq 1$ .

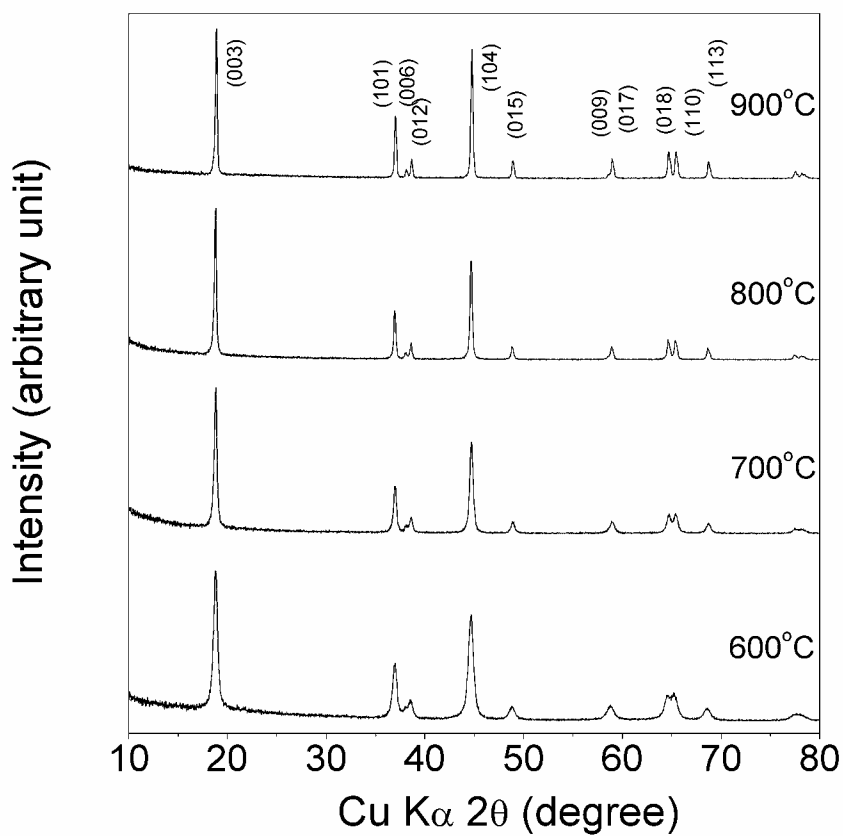

**Fig. S2** X-ray diffraction patterns of  $\text{LiNi}_{0.33}\text{Mn}_{0.33}\text{Co}_{0.33}\text{O}_2$  synthesized at various temperatures.

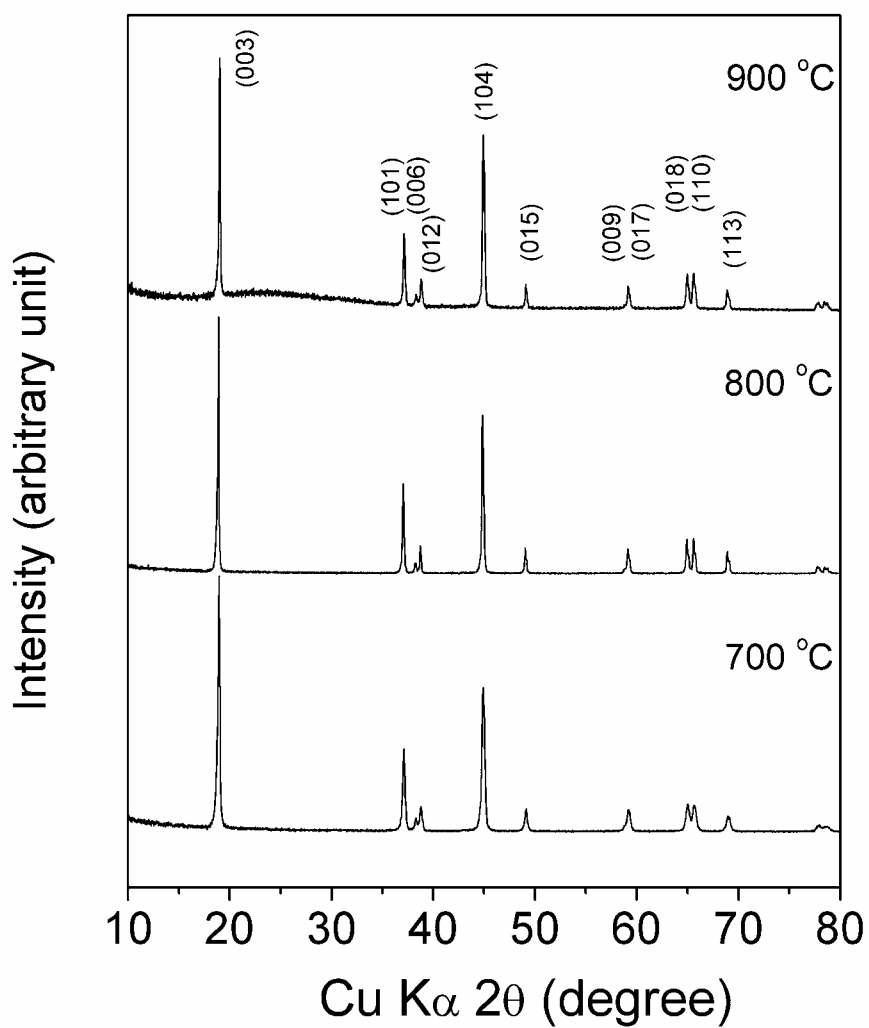

**Fig. S3** X-ray diffraction patterns of  $\text{LiNi}_{0.5}\text{Co}_{0.5}\text{O}_2$  synthesized at various temperatures.
